# Supplementary material for: Low genotypic diversity and long-term ecological decline in a spatially structured seagrass population
Source: PubMed Central journal article supplement (PMC6895181; doi:10.1038/s41598-019-54828-1), 2019-12-05
Supplement: 41598_2019_54828_MOESM1_ESM.pdf [file 41598_2019_54828_MOESM1_ESM.pdf]

# **Low genotypic diversity and long-term ecological decline in a spatially structured seagrass population**

Nahaa M. Alotaibi<sup>1,2</sup>, Emma J. Kenyon<sup>3</sup>, Kevan J. Cook<sup>4</sup>, Luca Börger<sup>1</sup>, and James C. Bull<sup>1\*</sup>

## Supplementary Information

**Table S1.** Observed allele sizes in our five sampling sites around the Isles of Scilly, U.K.: Broad Ledges Tresco (blt), Higher Town Bay (htb), Little Arthur (la), Old Grimsby Harbour (ogh), and West Broad Ledges (wbl).

|     | CL559Contig1 | CL202Contig1 | CL805Contig1  | CL172Contig1 | ZMC05062     | ZME05315 |
|-----|--------------|--------------|---------------|--------------|--------------|----------|
| blt | 173, 177     | 202, 215     | 188, 190, 194 | 193, 197     | 98, 102      | 180, 182 |
| htb | 173, 177     | 202, 215     | 188, 190, 194 | 193, 197     | 98           | 180, 182 |
| la  | 173          | 202, 215     | 188, 194      | 193, 197     | 98, 102      | 180, 182 |
| ogh | 173          | 202, 215     | 188, 194      | 193          | 98, 100, 102 | 180, 182 |
| wbl | 173, 177     | 202, 215     | 188, 194      | 193, 197     | 98, 102      | 180, 182 |

**Table S2.** Pairwise distance matrix between five *Zostera marina* meadows in the Isles of Scilly, UK. Upper triangle shows genetic distance (Fst). Lower triangle shows geographic distance (m) between sampling sites.

|     | blt  | htb   | la    | ogh   | wbl   |
|-----|------|-------|-------|-------|-------|
| blt | -    | 0.030 | 0.024 | 0.047 | 0.031 |
| htb | 4493 | -     | 0.028 | 0.038 | 0.019 |
| la  | 4719 | 955   | -     | 0.026 | 0.009 |
| ogh | 2243 | 3992  | 4639  | -     | 0.027 |
| wbl | 2223 | 2911  | 3520  | 1122  | -     |

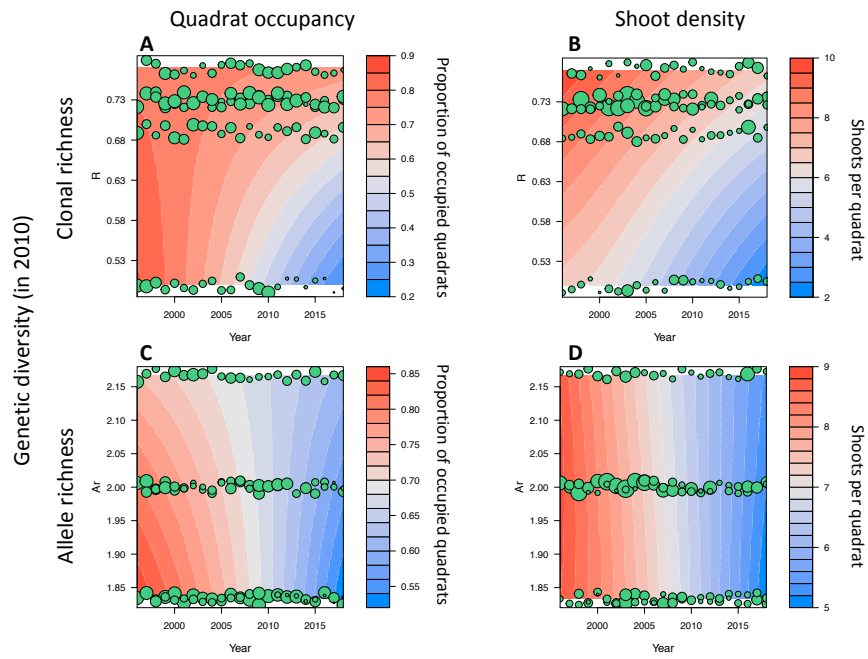

Long-term ecological monitoring (1996-2018)

**Figure S1.** The association between genetic diversity and long-term population trends in *Zostera marina*. (A) Clonal richness (R) against quadrat occupancy. (B) Clonal richness (R) against non-zero shoot density. (C) Allele richness (Ar) against quadrat occupancy. (D) Allele richness (Ar) against non-zero shoot density. Colour scale represents fitted values. Point sizes indicate median values from empirical data. A small amount of jitter is applied to the y-coordinate for illustrative purposes.
